# Supplementary material
Source: ML conference proceedings conference paper supplement (https://proceedings.mlr.press/v119/zhang20i.html)

## A. Missing Proofs

*Proof of Lemma 5 (Hypervolume as Scalarization).*

Without loss of generality, let  $z = 0$  be the origin and consider computing the volume of a rectangle with corners at the origin and at  $y = (y_1, \dots, y_k) \geq 0$ , but doing so in polar coordinates centered at  $z$ . Given a direction  $v \in \mathcal{S}_+^{k-1}$  with  $v_i \geq 0$  for all  $i$ , and  $\|v\| = 1$ , lets suppose a ray in the direction of  $v$  exits the rectangle at a point  $p = cv$  so that  $\|p\| = c$ . We claim that  $\|p\| = \min_i (y_i/v_i)$ . Note that this claim holds in any norm; however for the eventual dominated hypervolume calculation to hold, we use the  $\ell_2$  norm.

Note that by definition of  $p$  we have  $p_j \leq y_j$  for all  $j$  and there must exist  $i$  such that  $p_i = y_i$ . Also  $p_j/v_j = c = p_i/v_i$  for any  $i, j$  since  $p = cv$ . It follows that  $c \leq y_j/v_j$  for all  $j$  and  $c = y_i/v_i$ , which proves  $\|p\| = \min_i (y_i/v_i)$ .

Integrating in polar coordinates, we can approximate an volume via radial slivers of the circle, which for a radius  $r$  sweeping through angles  $d\theta$  have an volume proportional to  $r^k d\theta$ . Hence, the volume of the of the rectangle is

$$\text{vol}(R) = c_k \int_{v \in \mathcal{S}_+^{k-1}} \min_i \left( \frac{y_i}{v_i} \right)^k d\theta(v)$$

under a uniform measure  $\theta$ , where the  $c_k$  is a constant that depends only on the dimension.

So far we assumed  $y \geq 0$ . Now, if any  $y_i < 0$ , then our total dominated hypervolume is zero and  $\min_i \frac{y_i}{v_i} < 0$ . So, by changing our scalarization slightly, we can account for any  $y$  and the volume of the rectangle with respect to the origin is given by:

$$\text{vol}(R) = c_k \int_{v \in \mathcal{S}_+^{k-1}} \min_i (\max(0, y_i/v_i))^k d\theta(v)$$

By definition of dominated hypervolume, note that  $\mathcal{HV}_z(Y) = \text{vol}(S)$  where

$$S = \{x \mid x \geq z, x \text{ is dominated by some } y \in Y\}.$$

Since  $S$  is simply the union of rectangles at  $y_1, \dots, y_m$  and note that wherever  $p$  exists  $S$ , the length of  $p$  is the maximal over all rectangles and so

$$\|p\| = \max_{y \in Y} \min_i \max(0, y_i/v_i).$$

Repeating the argument gives:

$$\text{vol}(S) = c_k \int_{v \in \mathcal{S}_+^{k-1}} \max_{y \in Y} \left[ \min_i (\max(0, y_i/v_i))^k \right] d\theta(v)$$

To calculate  $c_k$ , we simply evaluate the hypervolume of the  $k$ -dimensional ball in the positive orthant. If the ball

has radius and is centered at the origin. In this case we get  $\int_{v \in \mathcal{S}_+^{k-1}} r^k d\mu(v) = r^k$  and  $c_k \int_{v \in \mathcal{S}_+^{k-1}} r^k d\mu(v) = V_k(r)/2^k$  where  $V_k(r)$  is defined as the volume of the  $k$ -dimensional ball of radius  $r$ , which is  $\pi^{k/2} r^k / \Gamma(k/2+1)$ . The formula for  $c_k$  then follows from some basic algebra.  $\square$

*Proof of Lemma 6 (Hypervolume Concentration).* Recall  $s_\lambda(y) = \min_i (\max(0, y_i/\lambda_i))^k$  and  $\|\lambda\| = 1$ . Note that there must exist  $i$  such that  $\lambda_i \geq k^{-1/2}$  and therefore  $(\max(0, y_i/\lambda_i))^k \leq (Bk^{1/2})^k$  where  $i^*$  is the index that minimizes  $\max(0, y_i/\lambda_i)$ . Note that the gradient of  $s_\lambda(y)$ , if non-zero, is  $k y_{i^*}^{k-1} / \lambda_{i^*}^k$  and therefore, the Lipschitz constant is bounded by  $k(Bk^{1/2})^k = B^k k^{1+k/2}$ .

Since  $0 \leq s_\lambda(y - z) \leq B^k k^{k/2}$  for any  $\lambda$  and  $y$ , we conclude by standard Chernoff bounds that if weight vectors  $\lambda_j$  are independent samples,

$$\Pr \left( \left| \mathbb{E}_{\lambda \sim \mathcal{S}_+^{k-1}} [\max_{y \in Y} s_\lambda(y - z)] - \frac{1}{s} \sum_j \max_{y \in Y} s_{\lambda_j}(y - z) \right| \geq \epsilon \right) \leq 2 \exp(-2s\epsilon^2 / (B^{2k} k^k))$$

Therefore, choosing  $s = O(B^{2k} k^k \log(1/\delta)/\epsilon^2)$  samples from  $\mathcal{S}_+^{k-1}$  bounds the failure probability by  $\delta$  and using Lemma 5, our result follows.  $\square$

*Proof of Theorem 9 (General Regret Bounds).* WLOG, let  $z = 0$ . Let  $X_T = \bigcup_i \left\{ x_{\lambda_i}^{(t)} \right\}_{t=1}^T$ . Then, for  $\lambda_1, \dots, \lambda_l$ , by the guarantees of  $\mathcal{A}$ , we deduce that

$$\frac{1}{l} \sum_{i=1}^l \left[ \max_{x \in \mathcal{X}} s_{\lambda_i}(F(x)) - \max_{x \in X_T} s_{\lambda_i}(F(x)) \right] \leq \epsilon_T$$

By Lemma 6, we see that for the Pareto frontier  $Y^*$ , we have concentration to the desired hypervolume:

$$\left| \frac{1}{c_k} \mathcal{HV}_z(Y^*) - \frac{1}{l} \sum_i \max_{x \in \mathcal{X}} s_{\lambda_i}(x) \right| \leq \epsilon$$

when  $l = O(B^{2k} k^k \log(1/\delta)/\epsilon^2)$  with probability  $1 - \delta$ . We would like to apply the same lemma to also show that our empirical estimate is close to  $\mathcal{HV}_z(X_T)$ . However, since  $X_T$  depends on  $\lambda_i$ , this requires a union bound and we proceed with a  $\epsilon$ -net argument.

We assume that  $F(\mathcal{X}) \subseteq [0, B]^k$  and let us divide the hypercube into a grid with spacing  $\Delta$ . Then, there are

$O((B/\Delta)^k)$  lattice points on the grid. Consider the Pareto frontier of any set of points, call it  $S$ . Out of the  $(B/\Delta)^k$  small hypercubes of volume  $\Delta^k$  in grid, note that by the monotonicity property of the frontier,  $S$  intersects at most  $(2B/\Delta)^{k-1}$  small hypercubes.

Therefore, we can find a set  $S_u$  consisting of at most  $(2B/\Delta)^{k-1}$  lattice points on the grid such that  $|\mathcal{HV}_z(S) - \mathcal{HV}_z(S_u)| \leq (2B)^k \Delta$ . This can be done by simply looking at each small hypercube that has intersection with  $S$  and choosing the lattice point that increases the dominated hypervolume. Since each small hypercube has volume  $\Delta^k$  and there are at most  $(2B/\Delta)^{k-1}$  hypercubes, the total hypervolume increased is at most  $2^k \Delta$ .

Finally, there are at most  $(B/\Delta)^{k(2B/\Delta)^{k-1}}$  choices of  $S_u$ , so to apply a union bound over all possible sets  $S_u$ , we simply choose  $l = O(B^{2k} k^{k+1} (2B/\Delta)^{k-1} \log(B/\Delta)/\epsilon^2)$  so that for any possible  $S_u$ , we use Lemma 6 to deduce that with high probability,

$$\left| \frac{1}{c_k} \mathcal{HV}_z(S_u) - \frac{1}{l} \sum_i \max_{x \in S_u} s_{\lambda_i}(x) \right| \leq \epsilon$$

Since  $\mathcal{HV}_z(S)$  is close to  $\mathcal{HV}_z(S_u)$ , we conclude that for any  $S$ ,

$$\left| \frac{1}{c_k} \mathcal{HV}_z(S) - \frac{1}{l} \sum_i \max_{x \in S} s_{\lambda_i}(x) \right| \leq \epsilon + \frac{(2B)^k \Delta}{c_k}$$

Together, we conclude that

$$|\mathcal{HV}_z(F(X_T)) - \mathcal{HV}_z(Y^*)| \leq c_k \epsilon_T + 2c_k \epsilon + (2B)^k \Delta$$

By choosing  $\epsilon = \epsilon_T$  and  $\Delta = c_k \epsilon_T (2B)^{-k}$ , we conclude.

□

## B. Figures

# Random Hypervolume Scalarizations for Provable Multi-Objective Black Box Optimization

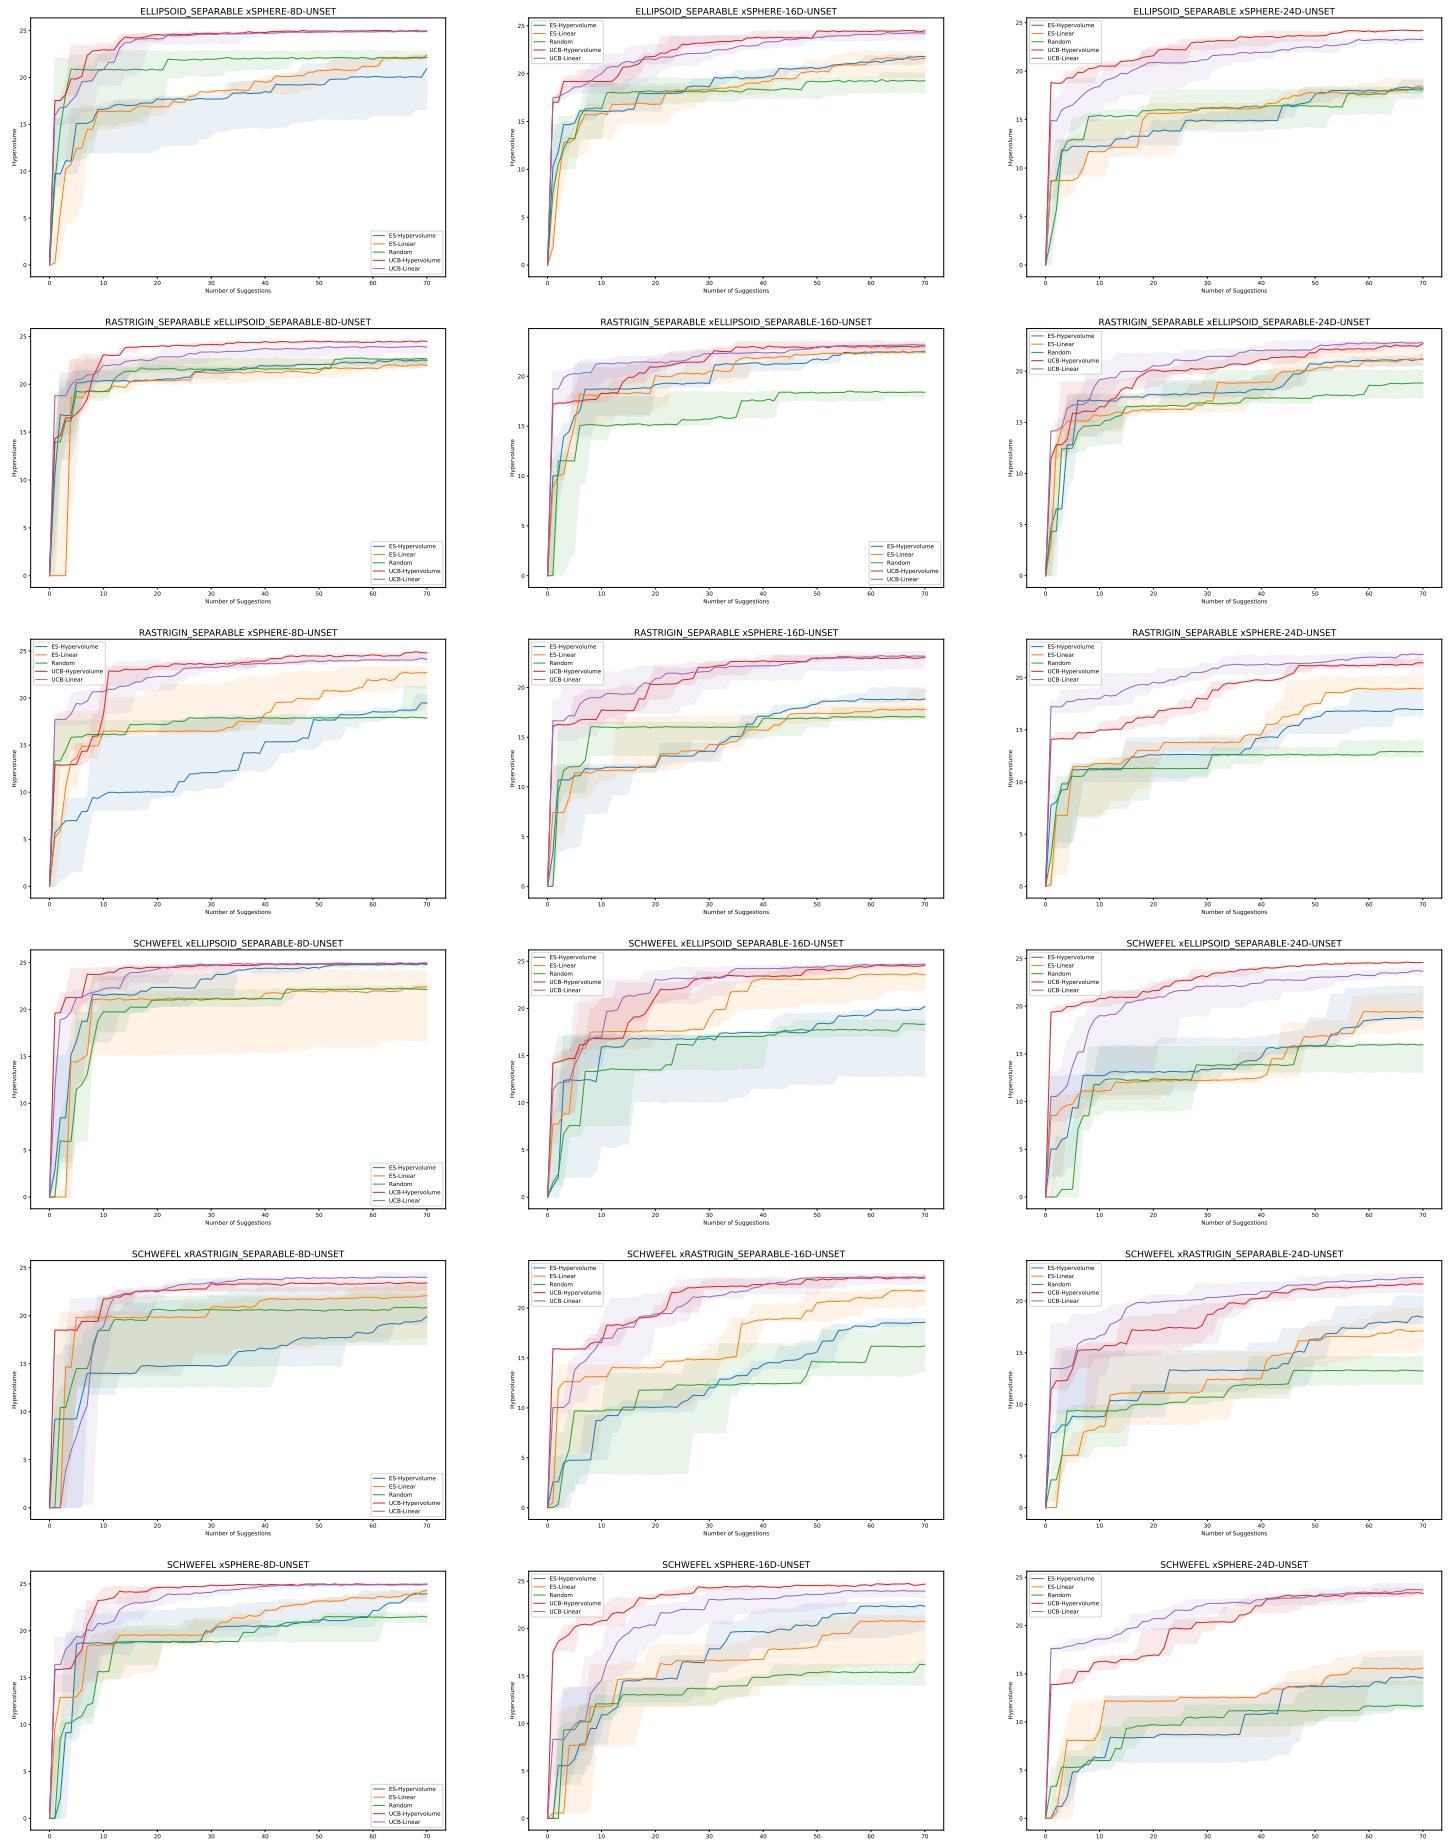

Supplement: Supplementary file [file zhang20i-supp.pdf]
